# Supplementary material
Source: PubMed Central journal article supplement (PMC5863093)
Supplement: NIHMS949635-supplement-Tables_I-III.pdf [file NIHMS949635-supplement-Tables_I-III.pdf]

## Supplementary Material

In a situation with independent censoring (Table I), the FO analysis, which is the gold standard method, targets the true values in all situations and produces the coverage rates comparable to the nominal level, 95%. The PO analysis, which does not use the information from the prognostic covariates, targets the true values and produces the coverage rates comparable to the nominal level but yields higher estimates of standard errors compared to the FO analysis. The ECS<sub>5</sub> method targets the true values but yields much lower estimates of standard errors (SE) compared to the empirical standard error (SD). As a result, the coverage rates are slightly off from the nominal level. The KMIB, IPCW<sub>5</sub> method and all of the  $WKM_{I,J}$  methods also target the true values, give coverage rates comparable to the nominal level and yield lower estimates of standard errors compared to the PO analysis, except for the KMIB method when the working failure time model is misspecified. The KMIB method yields higher estimates of standard errors compared to the IPCW<sub>5</sub> and  $WKM$  methods, especially when the working failure time model is misspecified. The maximum possible gain of efficiency is 34% derived from the FO results based on SD at the median survival time, i.e.  $S(t) = 0.5$ . The  $WKM_{8,1}$  method gains efficiency ranging from 5% to 8% and the IPCW method gains 5% in efficiency. This indicates that the  $WKM_{I,J}$ , which categorizes the two risk scores through the use of the principal component method, recovers between 15% and 24% of information lost due to censoring while estimating the marginal survival and the IPCW method recovers about 14% of the lost information. The ECS<sub>3</sub> method, which only incorporates the first three covariates in the PH model, also targets the true values and yields lower estimates of standard errors and the coverage rate is slightly lower than the nominal level. The IPCW<sub>3</sub> method, which only incorporates the first three covariates in the model, targets the true values and the coverage rates are comparable to the nominal level.

In a situation with dependent censoring and the link functions correctly specified (Table II),

the PO method is associated with bias, which does not decrease with sample size. In contrast, the bias for the WKM method decreases with sample size. In a situation with dependent censoring and the link functions incorrectly specified (Table III), the ECS method is associated with bias but the bias does not increase with sample size. In addition, the SE is lower than the SD. Although the ECS method is associated with bias, the MSE is slightly lower compared to the KMIB and WKM methods. The IPCW method is also associated with bias, and the bias increases with sample size. In addition, the SD is much higher than the SE. As a result, the coverage rate for the IPCW method is off from the nominal level and the MSE is much higher than the ECS, KMIB and WKM methods. For the WKM method, we observe similar results to a situation with dependent censoring and the link functions correctly specified, except the magnitude of the bias is slightly larger. The bias decreases with sample size. This indicates that the WKM method could produce reasonable survival estimates even if the link functions for the working models are incorrectly specified. For the KMIB method, we observe similar results to Table IV in which the magnitude of bias for the KMIB method is slightly higher than for the WKM method. The bias does not decrease with sample size. The KMIB and WKM methods produce similar MSE.

Table I. Monte Carlo results for five time-independent covariates with independent censoring (censoring rate=40%) and the link functions correctly specified. n=200. Spearman's  $\rho = 0.00$

| Method                                        | True Value: 0.5  |                 |                 |                 | True Value: 0.35 |        |        |      |
|-----------------------------------------------|------------------|-----------------|-----------------|-----------------|------------------|--------|--------|------|
|                                               | Est <sup>a</sup> | SD <sup>b</sup> | SE <sup>c</sup> | CR <sup>d</sup> | Est              | SD     | SE     | CR   |
| FO                                            | 0.500            | 0.0350          | 0.0353          | 94.7            | 0.350            | 0.0338 | 0.0336 | 94.1 |
| PO                                            | 0.499            | 0.0430          | 0.0430          | 93.7            | 0.349            | 0.0425 | 0.0425 | 94.5 |
| ECS <sub>3</sub>                              | 0.499            | 0.0431          | 0.0380          | 91.9            | 0.350            | 0.0418 | 0.0370 | 90.3 |
| ECS <sub>5</sub>                              | 0.504            | 0.0425          | 0.0320          | 86.4            | 0.353            | 0.0412 | 0.0310 | 85.5 |
| IPCW <sub>3</sub>                             | 0.499            | 0.0414          | 0.0417          | 94.5            | 0.350            | 0.0428 | 0.0408 | 93.9 |
| IPCW <sub>5</sub>                             | 0.500            | 0.0420          | 0.0406          | 94.6            | 0.351            | 0.0416 | 0.0396 | 94.3 |
| Both working PH models correctly specified    |                  |                 |                 |                 |                  |        |        |      |
| KMIB                                          | 0.500            | 0.0425          | 0.0412          | 93.3            | 0.351            | 0.0407 | 0.0404 | 94.1 |
| <i>WKM</i> <sub>4,1</sub>                     | 0.500            | 0.0410          | 0.0409          | 94.3            | 0.350            | 0.0402 | 0.0400 | 94.4 |
| <i>WKM</i> <sub>4,2</sub>                     | 0.500            | 0.0412          | 0.0409          | 93.9            | 0.351            | 0.0405 | 0.0401 | 94.6 |
| <i>WKM</i> <sub>4,4</sub>                     | 0.500            | 0.0413          | 0.0407          | 94.5            | 0.353            | 0.0408 | 0.0398 | 94.4 |
| <i>WKM</i> <sub>8,1</sub>                     | 0.500            | 0.0413          | 0.0407          | 94.4            | 0.350            | 0.0404 | 0.0398 | 94.8 |
| <i>WKM</i> <sub>8,2</sub>                     | 0.501            | 0.0416          | 0.0405          | 93.6            | 0.353            | 0.0413 | 0.0396 | 94.3 |
| <i>WKM</i> <sub>16,1</sub>                    | 0.500            | 0.0418          | 0.0405          | 93.8            | 0.352            | 0.0412 | 0.0395 | 93.8 |
| Only working failure PH model mis-specified   |                  |                 |                 |                 |                  |        |        |      |
| KMIB                                          | 0.500            | 0.0432          | 0.0422          | 94.5            | 0.351            | 0.0414 | 0.0418 | 94.9 |
| <i>WKM</i> <sub>4,1</sub>                     | 0.499            | 0.0418          | 0.0421          | 94.3            | 0.349            | 0.0411 | 0.0414 | 94.7 |
| <i>WKM</i> <sub>4,2</sub>                     | 0.500            | 0.0411          | 0.0420          | 94.7            | 0.350            | 0.0408 | 0.0412 | 94.5 |
| <i>WKM</i> <sub>4,4</sub>                     | 0.500            | 0.0416          | 0.0416          | 93.9            | 0.351            | 0.0416 | 0.0407 | 93.6 |
| <i>WKM</i> <sub>8,1</sub>                     | 0.499            | 0.0419          | 0.0420          | 94.4            | 0.350            | 0.0413 | 0.0413 | 94.2 |
| <i>WKM</i> <sub>8,2</sub>                     | 0.500            | 0.0417          | 0.0415          | 93.9            | 0.352            | 0.0411 | 0.0407 | 93.9 |
| <i>WKM</i> <sub>16,1</sub>                    | 0.500            | 0.0428          | 0.0417          | 93.5            | 0.351            | 0.0423 | 0.0408 | 93.4 |
| Only working censoring PH model mis-specified |                  |                 |                 |                 |                  |        |        |      |
| KMIB                                          | 0.500            | 0.0427          | 0.0412          | 93.3            | 0.351            | 0.0406 | 0.0406 | 94.1 |
| <i>WKM</i> <sub>4,1</sub>                     | 0.499            | 0.0409          | 0.0409          | 94.4            | 0.350            | 0.0402 | 0.0400 | 94.5 |
| <i>WKM</i> <sub>4,2</sub>                     | 0.500            | 0.0412          | 0.0409          | 94.2            | 0.350            | 0.0405 | 0.0400 | 94.0 |
| <i>WKM</i> <sub>4,4</sub>                     | 0.500            | 0.0415          | 0.0407          | 94.0            | 0.352            | 0.0412 | 0.0397 | 93.5 |
| <i>WKM</i> <sub>8,1</sub>                     | 0.500            | 0.0412          | 0.0407          | 94.0            | 0.350            | 0.0405 | 0.0398 | 94.6 |
| <i>WKM</i> <sub>8,2</sub>                     | 0.500            | 0.0415          | 0.0405          | 93.7            | 0.352            | 0.0411 | 0.0396 | 93.8 |
| <i>WKM</i> <sub>16,1</sub>                    | 0.500            | 0.0419          | 0.0405          | 93.6            | 0.352            | 0.0414 | 0.0395 | 94.1 |

<sup>a</sup>Average of 1000 point estimates.

<sup>b</sup>Empirical standard deviation.

<sup>c</sup>Average estimated standard error.

<sup>d</sup>Coverage rate of 1000 95% confidence intervals.

Table II. Monte Carlo results for five time-independent covariates with dependent censoring (censoring rate=35%) and the link functions correctly specified: the effects of sample size on survival estimates when only the working failure time model is mis-specified. Spearman's  $\rho = 0.48$

| Method                    | N    | True Value: 0.5 |        |        |      | True Value: 0.35 |        |        |      |
|---------------------------|------|-----------------|--------|--------|------|------------------|--------|--------|------|
|                           |      | Est             | SD     | SE     | CR   | Est              | SD     | SE     | CR   |
| FO                        | 200  | 0.501           | 0.0352 | 0.0353 | 94.6 | 0.350            | 0.0343 | 0.0336 | 94.0 |
| PO                        | 200  | 0.568           | 0.0383 | 0.0394 | 58.6 | 0.426            | 0.0404 | 0.0411 | 53.7 |
| <i>WKM</i> <sub>8,1</sub> | 200  | 0.511           | 0.0420 | 0.0401 | 92.6 | 0.366            | 0.0419 | 0.0391 | 93.1 |
| FO                        | 400  | 0.500           | 0.0244 | 0.0250 | 94.9 | 0.350            | 0.0242 | 0.0238 | 95.1 |
| PO                        | 400  | 0.567           | 0.0272 | 0.0279 | 32.4 | 0.427            | 0.0294 | 0.0291 | 25.5 |
| <i>WKM</i> <sub>8,1</sub> | 400  | 0.507           | 0.0291 | 0.0288 | 94.0 | 0.362            | 0.0293 | 0.0280 | 91.8 |
| FO                        | 800  | 0.500           | 0.0176 | 0.0177 | 94.6 | 0.350            | 0.0171 | 0.0169 | 94.1 |
| PO                        | 800  | 0.567           | 0.0199 | 0.0198 | 7.3  | 0.426            | 0.0206 | 0.0206 | 3.5  |
| <i>WKM</i> <sub>8,1</sub> | 800  | 0.506           | 0.0208 | 0.0205 | 93.4 | 0.357            | 0.0204 | 0.0199 | 93.3 |
| FO                        | 2000 | 0.500           | 0.0113 | 0.0112 | 95.2 | 0.350            | 0.0103 | 0.0107 | 95.6 |
| PO                        | 2000 | 0.567           | 0.0125 | 0.0125 | 0.0  | 0.426            | 0.0127 | 0.0130 | 0.0  |
| <i>WKM</i> <sub>8,1</sub> | 2000 | 0.505           | 0.0132 | 0.0131 | 93.0 | 0.355            | 0.0126 | 0.0126 | 93.5 |

Table III. Monte Carlo results for five time-independent covariates with dependent censoring (censoring rate: 51%) and the link functions incorrectly specified as PH when true model is AFT. Spearman's

$$\rho = 0.59$$

| Method                            | True Value: 0.5 |        |                  |        |      | True Value: 0.35 |        |        |        |      |
|-----------------------------------|-----------------|--------|------------------|--------|------|------------------|--------|--------|--------|------|
|                                   | Est             | SD     | MSE <sup>a</sup> | SE     | CR   | Est              | SD     | MSE    | SE     | CR   |
| N=200                             |                 |        |                  |        |      |                  |        |        |        |      |
| FO                                | 0.500           | 0.0343 | 0.0012           | 0.0353 | 94.5 | 0.350            | 0.0335 | 0.0011 | 0.0336 | 94.8 |
| PO                                | 0.605           | 0.0389 | 0.0125           | 0.0404 | 27.3 | 0.472            | 0.0437 | 0.0168 | 0.0447 | 22.0 |
| Only mis-specified link functions |                 |        |                  |        |      |                  |        |        |        |      |
| ECS <sub>5</sub>                  | 0.487           | 0.0412 | 0.0019           | 0.0330 | 85.2 | 0.337            | 0.0409 | 0.0018 | 0.0320 | 84.6 |
| IPCW <sub>5</sub>                 | 0.489           | 0.0789 | 0.0063           | 0.0443 | 79.6 | 0.334            | 0.0842 | 0.0073 | 0.0426 | 72.2 |
| KMIB                              | 0.522           | 0.0430 | 0.0023           | 0.0440 | 92.8 | 0.377            | 0.0455 | 0.0028 | 0.0448 | 91.5 |
| WKM <sub>4,1</sub>                | 0.514           | 0.0463 | 0.0023           | 0.0441 | 91.7 | 0.374            | 0.0492 | 0.0030 | 0.0445 | 90.1 |
| WKM <sub>4,2</sub>                | 0.525           | 0.0454 | 0.0027           | 0.0428 | 88.8 | 0.391            | 0.0487 | 0.0041 | 0.0432 | 82.3 |
| WKM <sub>4,4</sub>                | 0.538           | 0.0452 | 0.0035           | 0.0408 | 82.8 | 0.412            | 0.0480 | 0.0061 | 0.0413 | 64.6 |
| WKM <sub>8,1</sub>                | 0.519           | 0.0462 | 0.0025           | 0.0425 | 90.7 | 0.383            | 0.0493 | 0.0035 | 0.0429 | 84.8 |
| WKM <sub>8,2</sub>                | 0.535           | 0.0451 | 0.0033           | 0.0409 | 82.9 | 0.408            | 0.0489 | 0.0058 | 0.0412 | 68.8 |
| WKM <sub>16,1</sub>               | 0.532           | 0.0454 | 0.0031           | 0.0408 | 84.2 | 0.405            | 0.0486 | 0.0054 | 0.0411 | 72.1 |
| N=400                             |                 |        |                  |        |      |                  |        |        |        |      |
| FO                                | 0.501           | 0.0247 | 0.0006           | 0.0250 | 95.7 | 0.350            | 0.0240 | 0.0006 | 0.0238 | 95.7 |
| PO                                | 0.604           | 0.0277 | 0.0116           | 0.0286 | 3.5  | 0.471            | 0.0312 | 0.0156 | 0.0316 | 3.3  |
| Only mis-specified link functions |                 |        |                  |        |      |                  |        |        |        |      |
| ECS <sub>5</sub>                  | 0.486           | 0.0303 | 0.0011           | 0.0230 | 84.2 | 0.334            | 0.0287 | 0.0011 | 0.0230 | 81.4 |
| IPCW <sub>5</sub>                 | 0.479           | 0.0827 | 0.0073           | 0.0351 | 76.3 | 0.317            | 0.0823 | 0.0079 | 0.0340 | 66.8 |
| KMIB                              | 0.523           | 0.0329 | 0.0016           | 0.0314 | 86.6 | 0.378            | 0.0334 | 0.0019 | 0.0320 | 84.1 |
| WKM <sub>4,1</sub>                | 0.511           | 0.0344 | 0.0013           | 0.0320 | 91.2 | 0.366            | 0.0361 | 0.0016 | 0.0322 | 88.4 |
| WKM <sub>4,2</sub>                | 0.516           | 0.0342 | 0.0014           | 0.0312 | 90.2 | 0.375            | 0.0363 | 0.0019 | 0.0316 | 84.3 |
| WKM <sub>4,4</sub>                | 0.524           | 0.0335 | 0.0017           | 0.0302 | 85.3 | 0.390            | 0.0357 | 0.0029 | 0.0306 | 73.4 |
| WKM <sub>8,1</sub>                | 0.511           | 0.0338 | 0.0013           | 0.0312 | 91.4 | 0.369            | 0.0357 | 0.0016 | 0.0315 | 88.0 |
| WKM <sub>8,2</sub>                | 0.520           | 0.0337 | 0.0015           | 0.0303 | 86.5 | 0.385            | 0.0357 | 0.0025 | 0.0306 | 76.3 |
| WKM <sub>16,1</sub>               | 0.518           | 0.0331 | 0.0014           | 0.0302 | 88.4 | 0.383            | 0.0348 | 0.0023 | 0.0305 | 79.2 |

<sup>a</sup>Mean square error: bias<sup>2</sup>+SD<sup>2</sup>.
